# Supplementary material
Source: Springer Nature journal article supplement (https://www.springermedizin.de/resource/supplementary/12889_2011_3564_MOESM2_ESM.pdf/9489274)
Supplement: MOESM2 [file 9489274]

Phase 1: Engagement with policy makers  
Community mobilisation  
Consciousness raising & collectivisation  
Community based organisations formed

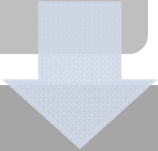

Phase 2: Recruitment of peer educators  
Condom distribution  
Establishment of STI clinics & drop-in centres  
Establishment of District AIDS Committees

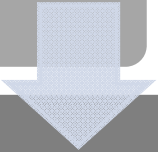

Phase 3: Activate District AIDS Committees  
Address violence and harassment  
Address social inequity  
Address stigma and discrimination
